# Supplementary material
Source: PubMed Central journal article supplement (PMC2850575)

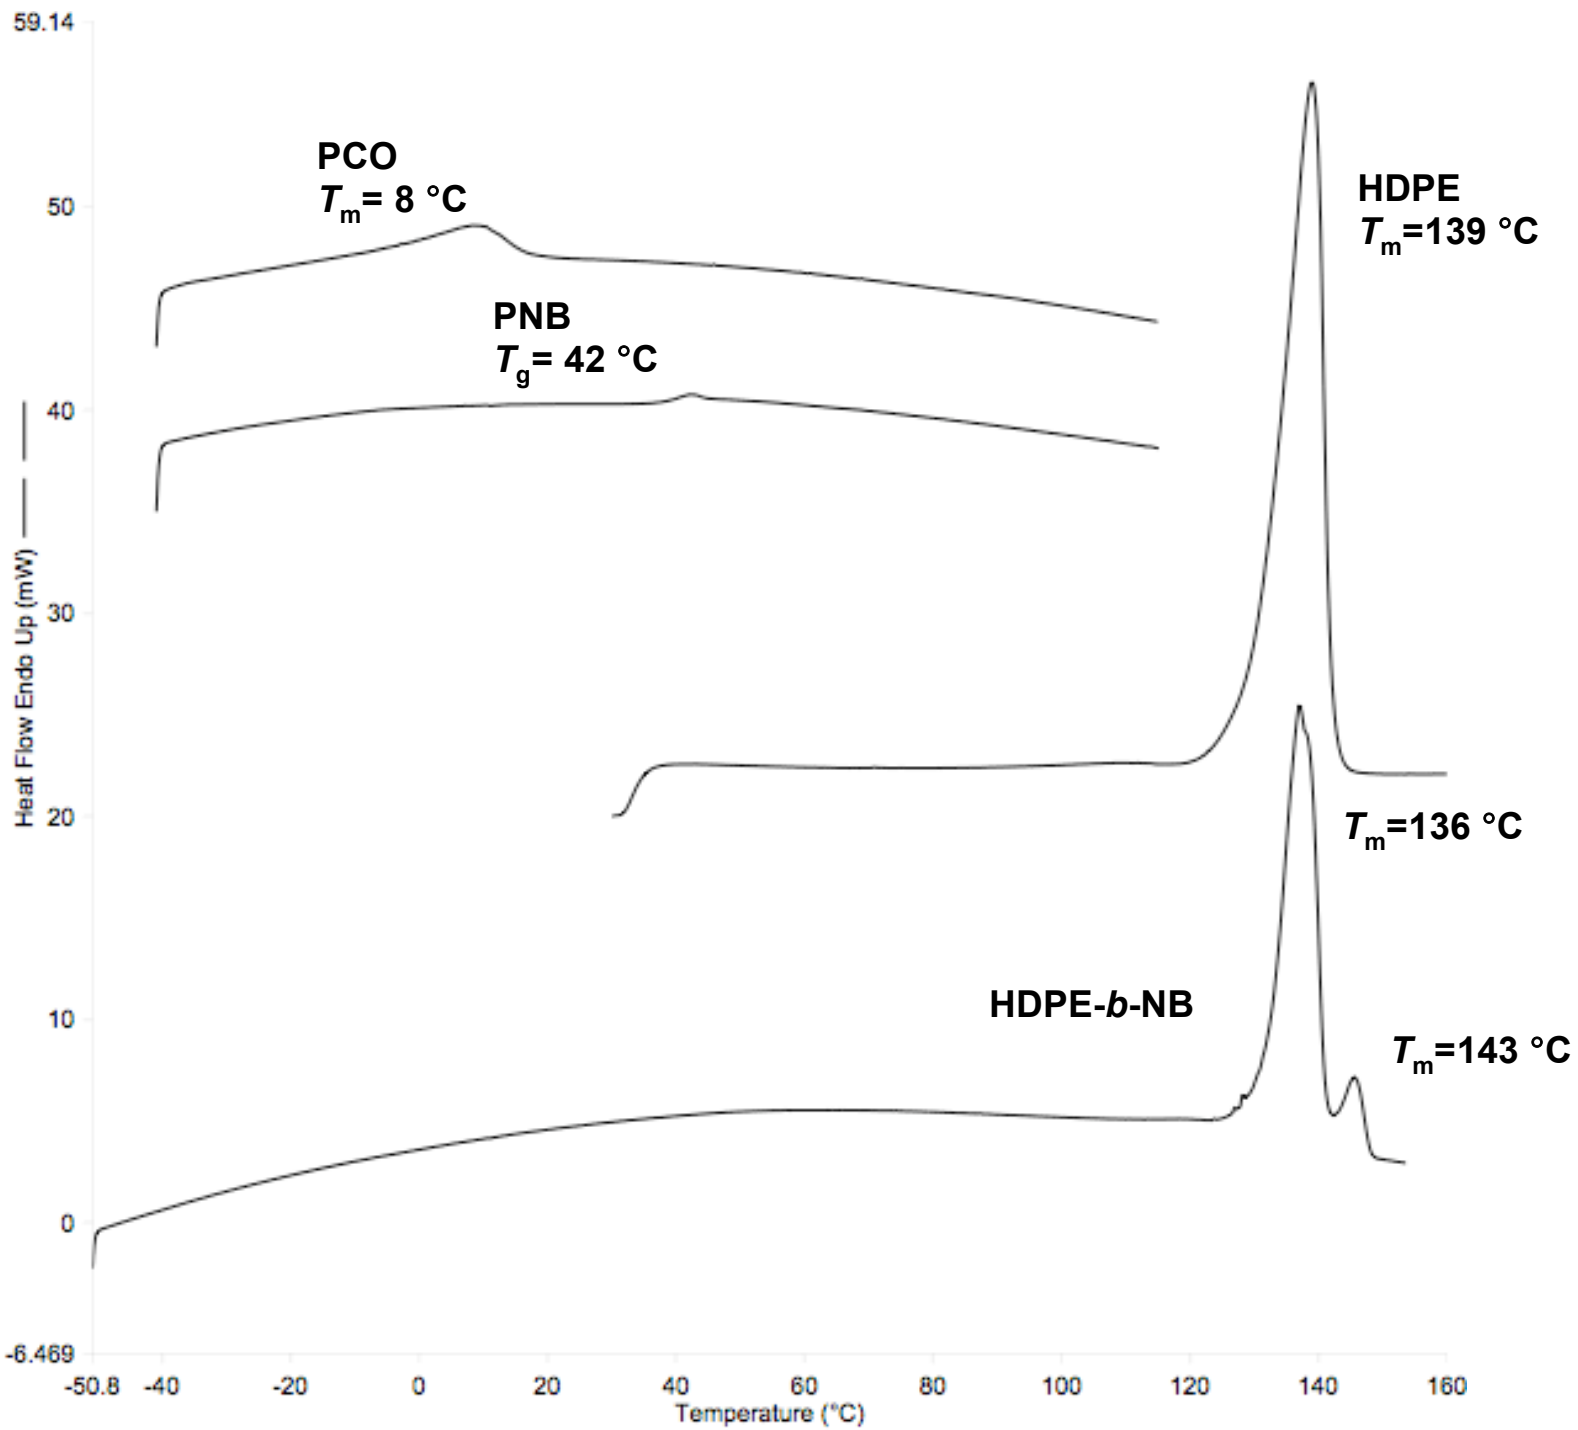

Supplement: NIHMS187580-supplement-SI_1.pdf [file NIHMS187580-supplement-SI_1.pdf]
